# Supplementary material for: D–π–A-type triphenylamine dye covalent-functionalized g-C3N4 for highly efficient photocatalytic hydrogen evolution
Source: Royal Society of Chemistry journal article supplement (doi:10.1039/d0cy00013b), 2020-01-01
Supplement: d0cy00013b1.pdf [file d0cy00013b1.pdf]

## Supporting Information

### **D- $\pi$ -A type triphenylamine dye covalent functionalized g-C<sub>3</sub>N<sub>4</sub> for highly efficient photocatalytic hydrogen evolution**

Chao Zhang,<sup>†a</sup> Jiandong Liu,<sup>†a</sup> Xingliang Liu<sup>\*a</sup> and Shiai Xu<sup>\*a,b</sup>

*a. School of Chemical Engineering, Qinghai University, Xining 810016, Qinghai, China. E-mail: liuxl1219@163.com*

*b. Shanghai Key Laboratory of Advanced Polymeric Materials, Key Laboratory for Ultrafine Materials of Ministry of Education, School of Materials Science and Engineering, East China University of Science and Technology, Shanghai 200237, China. E-mail: saxu@ecust.edu.cn*

*<sup>†</sup> These authors contributed equally to this work.*

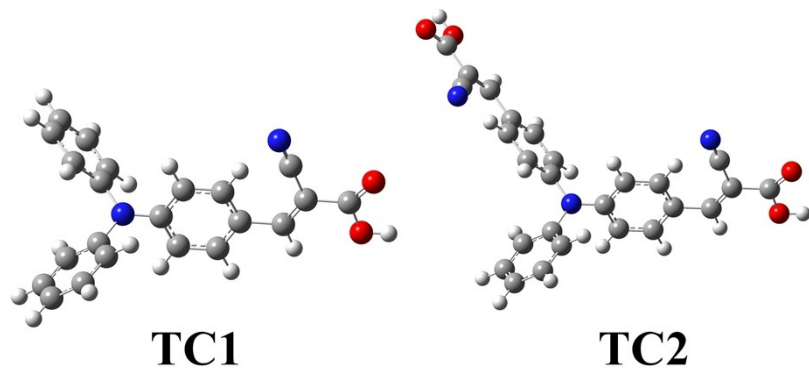

Scheme S1 Dyes structure of TC1 and TC2

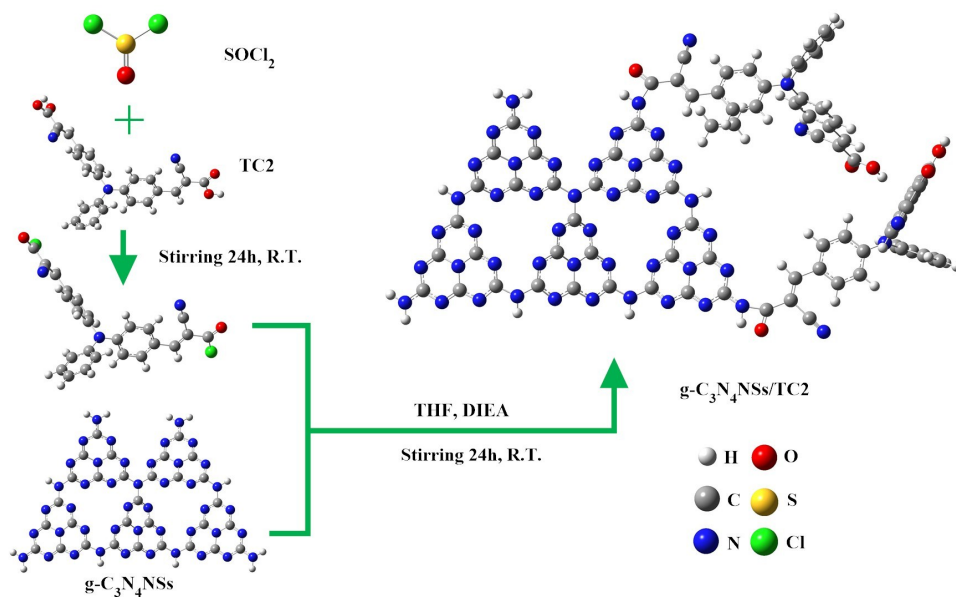

Scheme S2 Synthesis of g-C<sub>3</sub>N<sub>4</sub> NSs/TC2(C<sub>82</sub>H<sub>42</sub>N<sub>50</sub>O<sub>6</sub>)

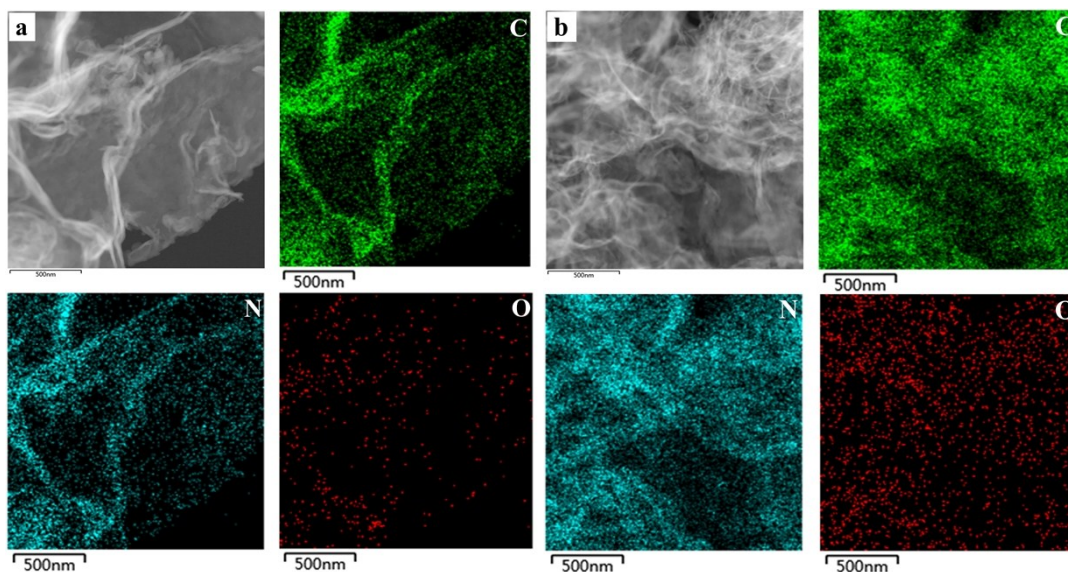

Fig. S1 Typical TEM images of as-prepared sample and elemental mapping (C (green), N (cyan), O (red)) (a) g-

$C_3N_4$ -NSs+TC1, (b)  $g-C_3N_4$  NSs/TC2.

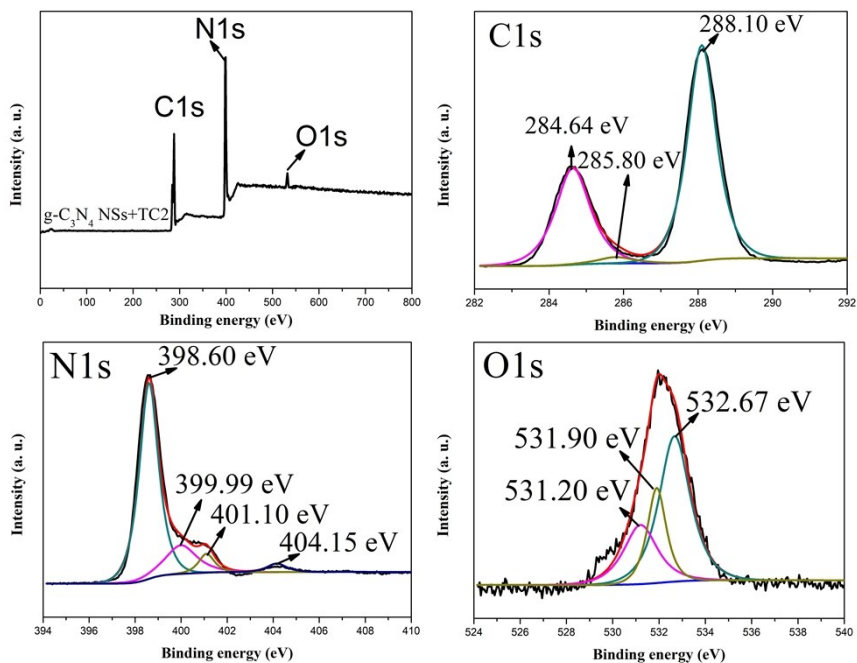

Fig. S2 High-resolution C 1s spectra, N 1s spectra and O 1s spectra of XPS spectra for  $g-C_3N_4$  NSs+TC2.

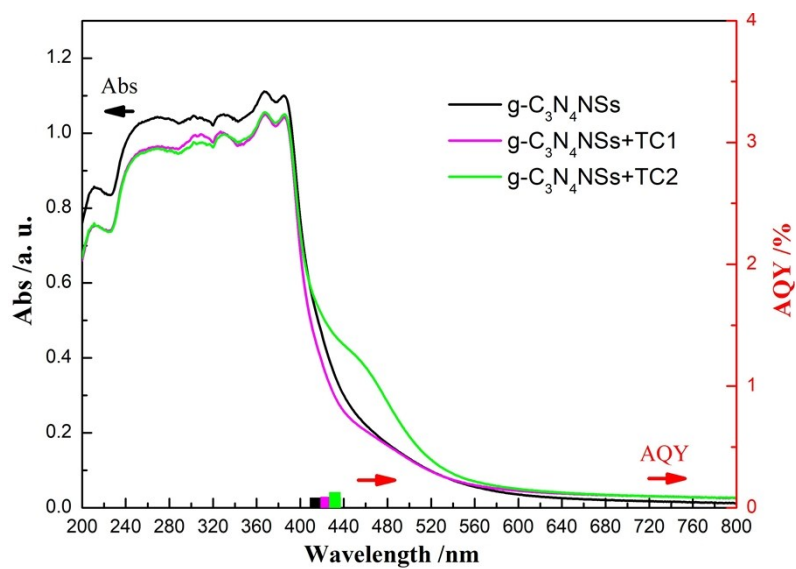

Fig. S3 Wavelength-dependent AQY and DRS spectrum of  $g-C_3N_4$  NSs,  $g-C_3N_4$  NSs+TC1s and  $g-C_3N_4$  NSs+TC2 in AA under  $\lambda=420$ nm.

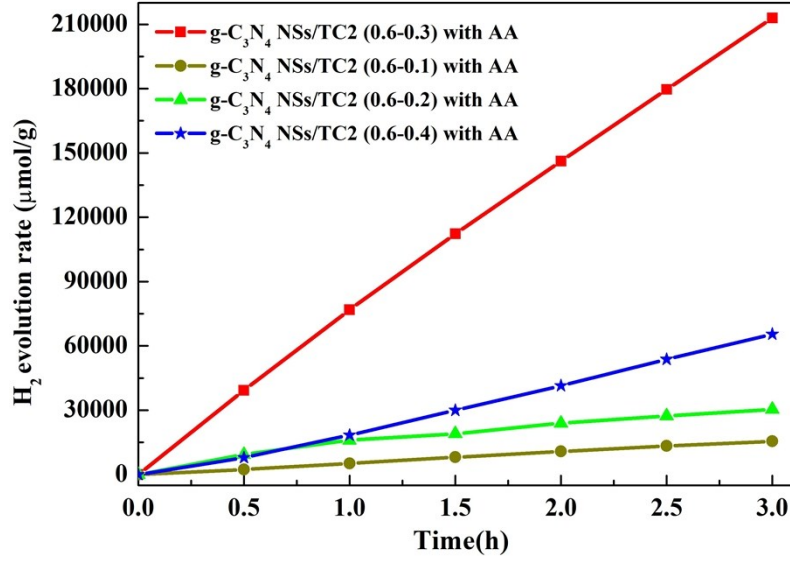

Fig. S4 Photocatalytic H<sub>2</sub> evolution as a function of reaction time with different mass ratio of dye TC2 and g-C<sub>3</sub>N<sub>4</sub> composed g-C<sub>3</sub>N<sub>4</sub> NSs/TC2 samples in AA under  $\lambda \geq 400$  nm.

Table S1. The corresponding hydrogen production, light intensity for the calculation of AQY and the obtained AQY value of g-C<sub>3</sub>N<sub>4</sub>/TC1.

| Band-pass filters | Photon flux ( $\mu\text{mol m}^{-2} \text{s}^{-1}$ ) | The irradiation area S( $\text{cm}^2$ ) | The calculated photon moles (mol/s) | The H <sub>2</sub> volume of g-C <sub>3</sub> N <sub>4</sub> /TC1 for 1 hour(ml/h) | The calculated H <sub>2</sub> moles of g-C <sub>3</sub> N <sub>4</sub> /TC1(mol/s) | The obtained AQY value of g-C <sub>3</sub> N <sub>4</sub> /TC1 |
|-------------------|------------------------------------------------------|-----------------------------------------|-------------------------------------|------------------------------------------------------------------------------------|------------------------------------------------------------------------------------|----------------------------------------------------------------|
| 420 nm            | 108.9                                                | 23.75                                   | $2.586 \times 10^{-7}$              | 4.00                                                                               | $4.547 \times 10^{-8}$                                                             | 35.16%                                                         |
| 500 nm            | 153.1                                                | 23.75                                   | $3.636 \times 10^{-7}$              | 4.33                                                                               | $4.922 \times 10^{-8}$                                                             | 27.07%                                                         |
| 520 nm            | 198.0                                                | 23.75                                   | $4.702 \times 10^{-7}$              | 3.50                                                                               | $3.979 \times 10^{-8}$                                                             | 16.92%                                                         |
| 600 nm            | 239.9                                                | 23.75                                   | $5.697 \times 10^{-7}$              | 1.35                                                                               | $1.535 \times 10^{-8}$                                                             | 5.39%                                                          |

Table S2. The corresponding hydrogen production, light intensity for the calculation of AQY and the obtained AQY value of g-C<sub>3</sub>N<sub>4</sub>/TC2.

| Band-pass filters | Photon flux ( $\mu\text{mol m}^{-2} \text{s}^{-1}$ ) | The irradiation area S( $\text{cm}^2$ ) | The calculated photon moles (mol/s) | The H <sub>2</sub> volume of g-C <sub>3</sub> N <sub>4</sub> /TC2 for 1 hour(ml/h) | The calculated H <sub>2</sub> moles of g-C <sub>3</sub> N <sub>4</sub> /TC2(mol/s) | The obtained AQY value of g-C <sub>3</sub> N <sub>4</sub> /TC2 |
|-------------------|------------------------------------------------------|-----------------------------------------|-------------------------------------|------------------------------------------------------------------------------------|------------------------------------------------------------------------------------|----------------------------------------------------------------|
| 420 nm            | 108.9                                                | 23.75                                   | $2.586 \times 10^{-7}$              | 3.12                                                                               | $3.547 \times 10^{-8}$                                                             | 27.43%                                                         |
| 500 nm            | 153.1                                                | 23.75                                   | $3.636 \times 10^{-7}$              | 2.10                                                                               | $2.387 \times 10^{-8}$                                                             | 13.14%                                                         |
| 520 nm            | 198.0                                                | 23.75                                   | $4.702 \times 10^{-7}$              | 2.00                                                                               | $2.274 \times 10^{-8}$                                                             | 9.67%                                                          |
| 600 nm            | 239.9                                                | 23.75                                   | $5.697 \times 10^{-7}$              | 0.26                                                                               | $2.956 \times 10^{-9}$                                                             | 1.04%                                                          |

**The specific calculation process example: Apparent quantum yields (AQY) calculation for g-C<sub>3</sub>N<sub>4</sub>/TC1 sample**

**1. The calculated H<sub>2</sub> moles produced from g-C<sub>3</sub>N<sub>4</sub>/TC1: for band-pass filter  $\lambda = 420$  nm**

Volume of gas liberated in reaction = 4.0 ml/h = 0.0040L/h

Form std. gas equation **PV= nRT**

$$n = 0.004\text{L} \times 1 \text{ atm} / 0.082 \text{ L}\cdot\text{atm mol}^{-1} \text{ K}^{-1} \times 298 \text{ K}$$

The corresponding amount of H<sub>2</sub> in moles = 0.000164 moles/h = 4.547×10<sup>-8</sup> moles/s

### 2. The calculated photon moles (mol/s):for band-pass filter λ= 420 nm

Photon flux (μmol m<sup>-2</sup> s<sup>-1</sup>)=108.9 μmol m<sup>-2</sup> s<sup>-1</sup>

The irradiation area S(cm<sup>2</sup>)=23.75cm<sup>2</sup>

The calculated photon moles (mol/s)=108.9×23.75/10000×0.000001=2.586×10<sup>-7</sup> mol/s

### 3. The calculated AQE %:for band-pass filter λ= 420 nm

$$AQY(\%) = \frac{2 \times \text{number of evolved H}_2 \text{ molecules}}{\text{number of incident photons}} \times 100$$

$$AQY(\%) = \frac{2 \times 4.547 \times 10^{-8}}{2.586 \times 10^{-7}} \times 100$$

$$AQY(\%) = 35.16\%$$

The calculation process is similar with the above calculation example and the relevant data should be made adaptive adjustments for other samples.

Table S3. The comparison of other dye-sensitized g-C<sub>3</sub>N<sub>4</sub> for photocatalytic H<sub>2</sub> production.

| Photocatalyst                                                      | Reaction conditions                                          | Wavelength of incident light (λ) | H <sub>2</sub> production activity            | AQY/%                                                            | Ref.      |
|--------------------------------------------------------------------|--------------------------------------------------------------|----------------------------------|-----------------------------------------------|------------------------------------------------------------------|-----------|
| MgPc-mpg-C <sub>3</sub> N <sub>4</sub> /Pt                         | 10vol% TEOA                                                  | λ≥640 nm                         | 4.5μmol h <sup>-1</sup> (λ≥640 nm)            | 0.07% (λ=660 nm)                                                 | S1        |
| Zn-tri-PcNc-1-g-C <sub>3</sub> N <sub>4</sub> /Pt co-adsorbed CDCA | 5μmol g <sup>-1</sup> dye, 50 mM AA                          | λ≥500 nm,                        | 125.2μmol h <sup>-1</sup>                     | 1.85% at (λ=700 nm)                                              | S2        |
| ZnPcNcs-Pt/g-C <sub>3</sub> N <sub>4</sub>                         | 5μmol g <sup>-1</sup> dye, 50 mM AA                          | λ≥500 nm,                        | 263μmol h <sup>-1</sup>                       | 0.97%                                                            | S3        |
| Zn-tri-PcNc-2-g-C <sub>3</sub> N <sub>4</sub> /Pt                  | 5μmol g <sup>-1</sup> dye, 50 mM AA                          | λ≥500 nm,                        | 132μmol h <sup>-1</sup>                       | 1.13% (λ=685 nm)                                                 | S4        |
| EY-mpg-C <sub>3</sub> N <sub>4</sub> /Pt                           | 15% TEOA, H2PtCl6                                            | λ≥420 nm                         | 115.5μmol h <sup>-1</sup>                     | 20.5%(λ=490 nm), 14.4%(λ=520 nm), 19.4%(λ=550 nm)                | S5        |
| ErB-Pt/g-C <sub>3</sub> N <sub>4</sub> nanosheets                  | 5% TEOA, 0.2g ErB                                            | λ≥550 nm                         | 162.5μmol h <sup>-1</sup>                     | 33.4% (λ=460 nm)                                                 | S6        |
| P3HT-g-C <sub>3</sub> N <sub>4</sub>                               | 3wt% P3HT, Na <sub>2</sub> S-Na <sub>2</sub> SO <sub>3</sub> | λ≥400 nm                         | 162.5μmol h <sup>-1</sup>                     | 2.9% (λ=420 nm)                                                  | S7        |
| BF-g-C <sub>3</sub> N <sub>4</sub> /Pt                             | 10% TEOA                                                     | λ≥420 nm                         | 1619.0μmol g <sup>-1</sup> h <sup>-1</sup>    | none                                                             | S8        |
| g-C <sub>3</sub> N <sub>4</sub> /TC1/Pt                            | saturated AA solution                                        | λ≥400 nm                         | 73555.8 μmol·h <sup>-1</sup> ·g <sup>-1</sup> | 35.2%(λ=420 nm), 27.1%(λ=500nm), 16.9%(λ=520 nm), 5.4%(λ=600 nm) | This work |
| g-C <sub>3</sub> N <sub>4</sub> /TC2/Pt                            | saturated AA solution                                        | λ≥400 nm                         | 70986.8μmol·h <sup>-1</sup> ·g <sup>-1</sup>  | 27.4%(λ=420 nm), 13.1%(λ=500nm), 9.6%(λ=520 nm), 1.04%(λ=600 nm) | This work |

## References

- S1. K. Takanahe, K. Kamata, X. C. Wang, M. Antonietti, J. Kubota and K. Domen, *Phys. Chem. Chem. Phys.*, 2010, 12, 13020-13025.
- S2. X. H. Zhang, L. J. Yu, C. S. Zhuang, T. Y. Peng, R. J. Li and X. G. Li, *ACS Catal.*, 2014, 4, 162-170.
- S3. X. H. Zhang, L. J. Yu, R. J. Li, T. Y. Peng and X. G. Li, *Catal. Sci. Technol.*, 2014, 4(9), 3251-3260.
- S4. L. J. Yu, X. H. Zhang, C. S. Zhuang, L. Lin, R. J. Li and T. Y. Peng, *Phys. Chem. Chem. Phys.*, 2014, 16, 4106-4114.
- S5. S. X. Min and G. X. Lu, *J. Phys. Chem. C*, 2012, 116, 25415-25424.
- S6. Y. B. Wang, J. D. Hong, W. Zhang and R. Xu, *Catal. Sci. Technol.*, 2013, 3, 1703-1711.
- S7. H. J. Yan and Y. Huang, *Chem. Commun.*, 2011, 47, 4168-4170.
- S8. H. Zhang, J. Lin, Z. Li, T. Li, J. Zhu, *Catal. Sci. Technol.*, 2019, 9, 502-508.
